# Supplementary material
Source: publisher site journal article supplement (https://www.kjim.org/upload/media/kjim-2024-034-Supplementary-Fig-1.pdf)
Supplement: Supplementary file 1 [file kjim-2024-034-Supplementary-Fig-1.pdf]

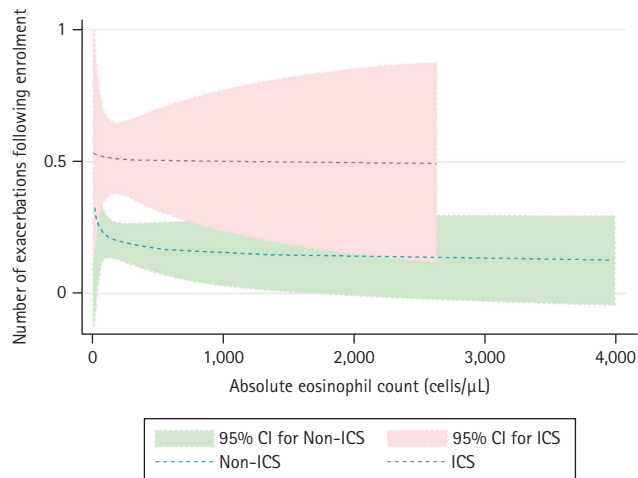

**Supplementary Figure 1.** Multivariable fractional polynomial negative binomial model. CI, confidence interval; ICS, inhaled corticosteroid.
